# Supplementary material for: Unsupervised identification of cardiometabolic profiles among adolescents: findings from the PARIS birth cohort study
Source: Springer Nature journal article supplement (doi:10.1007/s00431-023-05311-7), 2023-11-18

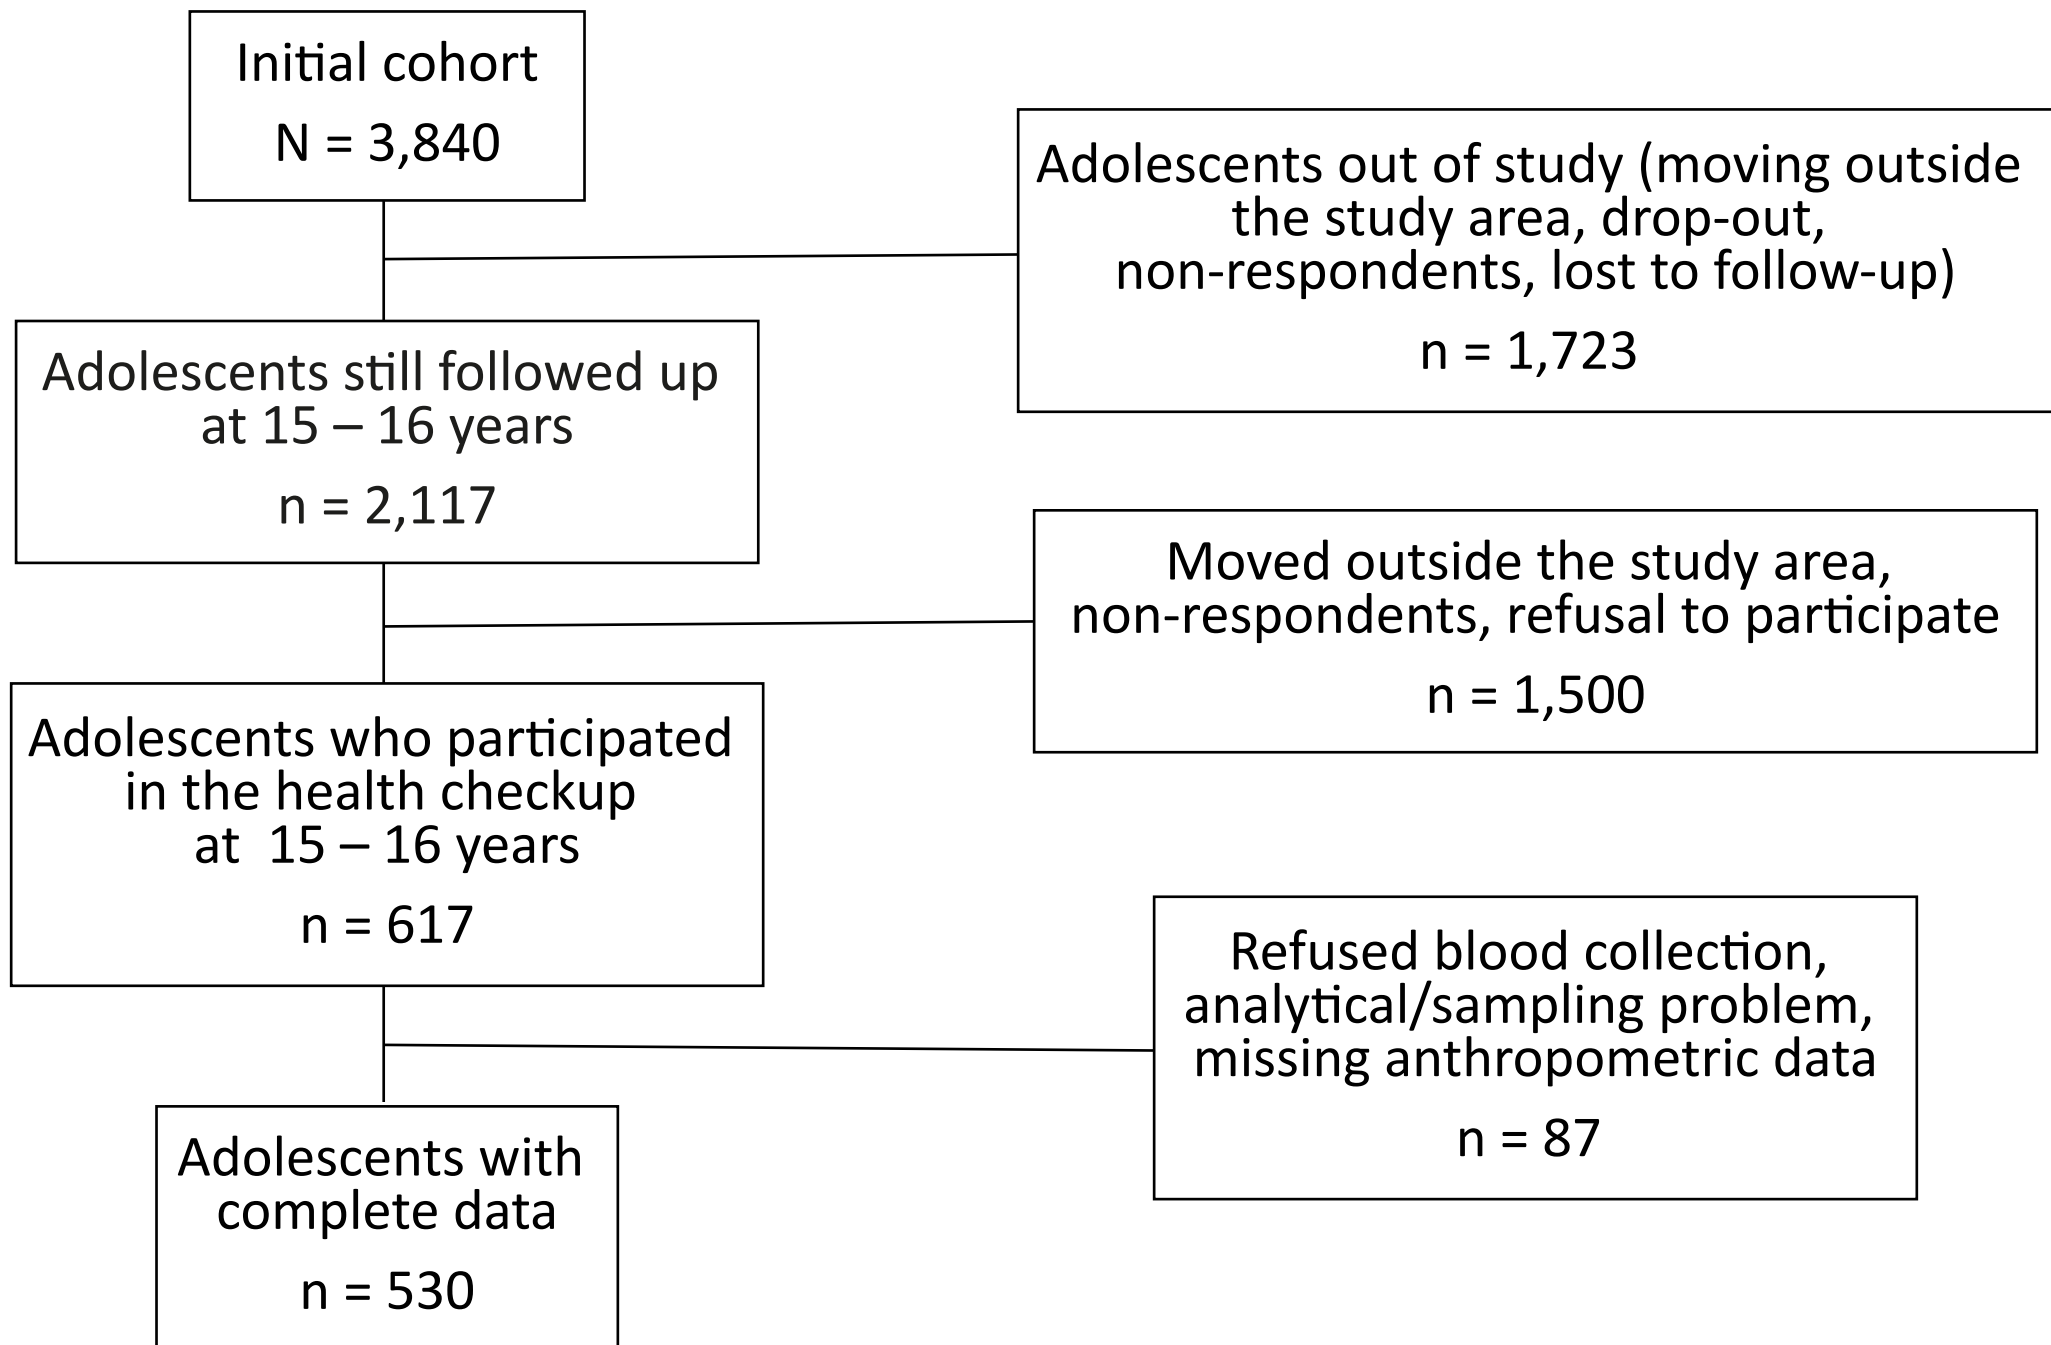

Supplement: MOESM1 [file 26323352]
